# Supplementary material for: A review of features and characteristics of smart medication adherence products
Source: PubMed Central journal article supplement — Can Pharm J (Ott). 2021 Jul 30;154(5):312–23. doi: 10.1177/17151635211034198 (PMC8408912; doi:10.1177/17151635211034198), 2021-07-30
Supplement: sj-pdf-1-cph-10.1177_17151635211034198.pdf [file sj-pdf-1-cph-10.1177_17151635211034198.pdf]

APPENDIX 1 Database-specific search strategy

| Database | Search Strategy                                                                                                                                                                                                                                                                                                                                                                                                                                                                                                                     |
|----------|-------------------------------------------------------------------------------------------------------------------------------------------------------------------------------------------------------------------------------------------------------------------------------------------------------------------------------------------------------------------------------------------------------------------------------------------------------------------------------------------------------------------------------------|
| PubMed   | (medication adherence[mesh] OR medication adherence[ti] OR medication therapy management[mesh] OR medication therapy management[ti] OR medication management[ti]) OR ((medication*[ti] OR drug*[ti]) AND (adhere*[ti] OR nonadher*[ti] OR compli*[ti] OR comply[ti])) AND (mobile applications[mesh] OR mobile*[ti] OR smart*[ti] OR mhealth[ti] OR technology[mesh] OR technolog*[ti] OR electronics[mesh] OR electronic*[ti] OR computers, handheld[mesh]) AND (dispens*[ti] OR product*[ti] OR device*[ti] OR delivery unit[ti]) |
| Scopus   | (TITLE-ABS-KEY ( medication AND compliance) OR TITLE-ABS-KEY ( medication AND adherence ) OR TITLE-ABS-KEY ( medication AND non-adherence ) OR TITLE-ABS-KEY ( medication AND management ) AND TITLE-ABS-KEY ( smart AND technology ) OR TITLE-ABS-KEY ( smart AND dispenser ) OR TITLE-ABS-KEY ( smart AND blister ) )                                                                                                                                                                                                             |
| Embase   | <ol style="list-style-type: none"> <li>1. (medication adherence or medication management or medication therapy management).ti</li> <li>2. (dispens* or product* or device* or delivery unot*).ti</li> <li>3. (smart*or mhealth*or technolog* or electronic* or mobile*).ti</li> <li>4. ((medication or drug) adj3(adh*or nonadh* or compli* or comly*)).ti</li> <li>5. 1 or 4</li> <li>6. 2 and 3 and 5</li> </ol>                                                                                                                  |

## APPENDIX 2 PRISMA flow diagram for the review of smart medication adherence products

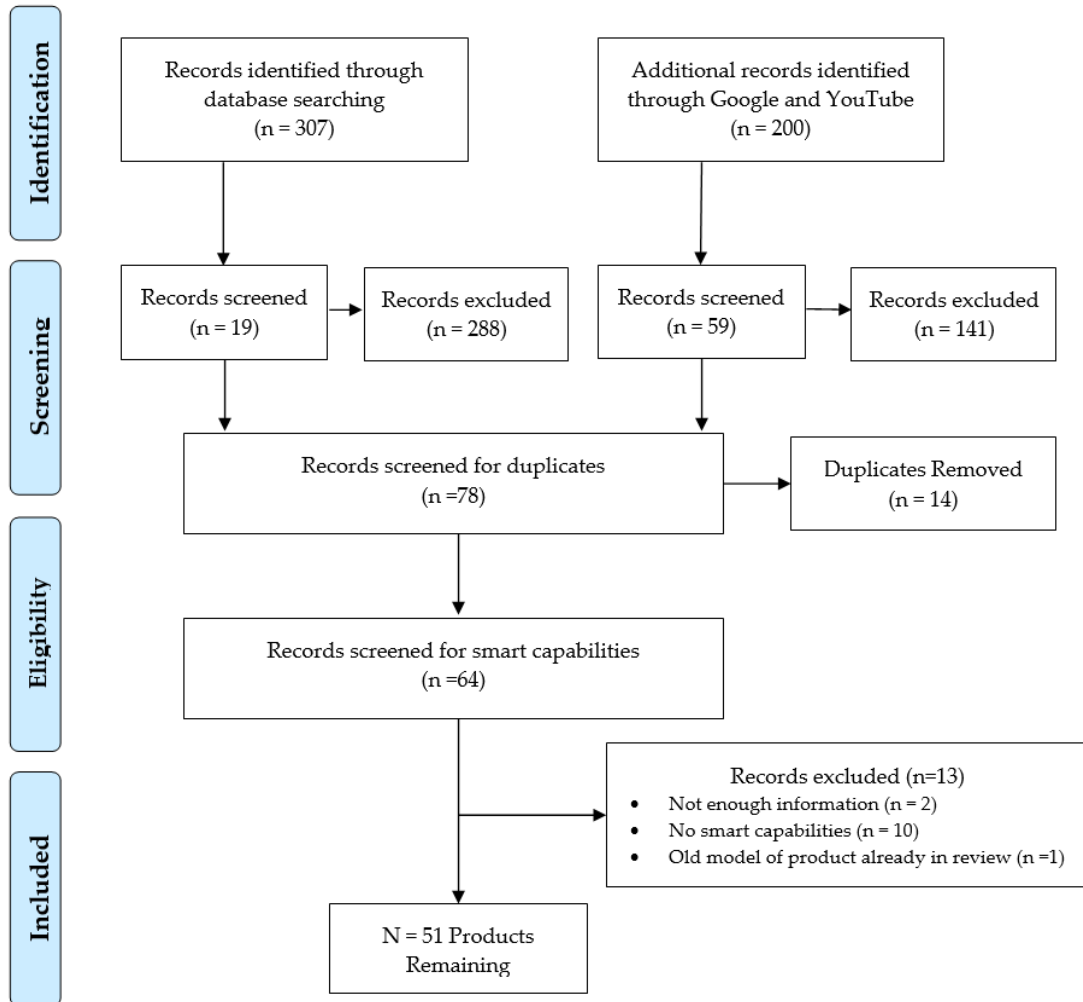

### APPENDIX 3 Commercially available oral smart MAPs

| Product Name                                     | Product Manufacturer         | Country or Region of Availability | Cost   | Subscription Fee | Storage Capacity | Alarm | Locking Feature | Portability | Patient Notifications | Cell Phone Required |
|--------------------------------------------------|------------------------------|-----------------------------------|--------|------------------|------------------|-------|-----------------|-------------|-----------------------|---------------------|
| <b>Automated Dispensers</b>                      |                              |                                   |        |                  |                  |       |                 |             |                       |                     |
| Emma                                             | INRange Systems, Inc.        | NA                                | NR     | ✓                | Multidose        | ✓     | ✓               |             | ✓                     |                     |
| e-pill MedSmart Plus                             | Cadex Watch                  | Global                            | \$\$\$ |                  | Multidose        | ✓     | ✓               |             | ✓                     |                     |
| Evendos                                          | Evendos                      | Europe                            | NR     | ✓                | Multidose        | ✓     | ✓               |             | ✓                     |                     |
| GMS Bluetooth Automatic Pill Dispenser           | GMS                          | NA                                | \$\$\$ |                  | Multidose        | ✓     | ✓               | ✓           | ✓                     | ✓                   |
| Hero                                             | Hero                         | NA                                | \$\$\$ | ✓                | Multidose        | ✓     | ✓               |             | ✓                     |                     |
| Karie                                            | AceAge Inc                   | NA                                | \$\$\$ | ✓                | Multidose        | ✓     | ✓               |             | ✓                     | ✓                   |
| Livi                                             | PharmRight Corporation       | NA                                | \$\$   | ✓                | Multidose        | ✓     | ✓               |             | ✓                     |                     |
| MedaCube                                         | PharmAdv                     | NA                                | \$\$\$ |                  | Multidose        | ✓     | ✓               |             | ✓                     |                     |
| MedReady MR-357FL                                | MedReady                     | NA                                | \$\$\$ | ✓                | Multidose        | ✓     | ✓               |             | ✓                     |                     |
| Philips Medication Dispenser                     | Philips                      | NA                                | \$\$   | ✓                | Multidose        | ✓     | ✓               |             | ✓                     |                     |
| Pillo                                            | Pillo Health                 | NA                                | \$\$\$ | ✓                | Multidose        | ✓     | ✓               |             | ✓                     | ✓                   |
| Pria                                             | Black+Decker                 | NA                                | \$\$\$ | ✓                | Multidose        | ✓     | ✓               |             | ✓                     | ✓                   |
| RxPense®                                         | Medipense                    | Global                            | NR     |                  | Multidose        | ✓     | ✓               |             | ✓                     |                     |
| Smart Pill Box Medicine Management System        | Bluestar Seniortech          | NA                                | \$\$   | ✓                | Multidose        | ✓     | ✓               | NR          | ✓                     | ✓                   |
| Spencer                                          | Catalyst Health              | NA                                | NR     | ✓                | Multidose        | ✓     |                 |             | ✓                     |                     |
| TabSafe                                          | TabSafe Medical Services Inc | NA                                | \$\$\$ | ✓                | Multidose        | ✓     | ✓               |             | ✓                     |                     |
| <b>Blister Packages/ Blister Package Holders</b> |                              |                                   |        |                  |                  |       |                 |             |                       |                     |
| Popit Sense                                      | Popit                        | Global except NA                  | \$\$   |                  | Unitdose         | ✓     |                 | ✓           | ✓                     | ✓                   |
| SimpleMed+ Medication Dispenser                  | Vacia                        | Global                            | \$\$   | ✓                | Multidose        | ✓     | ✓               |             | ✓                     | ✓                   |
| <b>Dosette/ Pill Boxes</b>                       |                              |                                   |        |                  |                  |       |                 |             |                       |                     |
| Elliegrid                                        | elliegrid                    | NA                                | \$\$\$ | ✓                | Multidose        | ✓     |                 |             | ✓                     | ✓                   |
| JON                                              | MedMinder                    | NA                                | \$\$   | ✓                | Multidose        | ✓     | ✓               | NR          | ✓                     |                     |
| MAYA                                             | MedMinder                    | NA                                | \$     | ✓                | Multidose        | ✓     |                 | NR          | ✓                     |                     |
| Pillgo                                           | QuaLife                      | Global                            | \$\$\$ |                  | Multidose        | ✓     |                 |             | ✓                     | ✓                   |
| Wisepill RT2000                                  | Wisepill Technologies        | Global                            | NR     |                  | Multidose        |       |                 | ✓           | ✓                     | ✓                   |

| Storage Boxes             |                              |         |      |    |           |   |   |    |   |
|---------------------------|------------------------------|---------|------|----|-----------|---|---|----|---|
| evriMED1000               | WisepII Technologies         | Global  | \$   | ✓  | Multidose | ✓ |   |    | ✓ |
| Sensemedic blister box    | Evalan                       | Global  | NR   |    | Unitdose  |   |   | NR | ✓ |
| Sensemedic pill dispenser | Evalan                       | Global  | NR   |    | Unitdose  |   |   | NR | ✓ |
| Vials/ Vial Caps          |                              |         |      |    |           |   |   |    |   |
| GlowCap                   | Vitality Inc / NantHealth    | NA      | \$   | ✓  | Unitdose  | ✓ |   | ✓  | ✓ |
| ILidRx                    | iRx Reminder LLC             | NA      | NR   | NR | Unitdose  | ✓ | ✓ | ✓  | ✓ |
| Pillsy                    | Pillsy Inc                   | NA      | NR   |    | Unitdose  | ✓ |   | ✓  | ✓ |
| Sensemedic pill bottle    | Evalan                       | Global  | NR   |    | Unitdose  |   |   | NR | ✓ |
| Smart bottle              | AdhereTech                   | NA (SP) | Free |    | Multidose |   |   | ✓  | ✓ |
| SmartMedReminderTM system | Concordance Health Solutions | NA (SP) | NR   | NR | Multidose | ✓ |   | ✓  | ✓ |

NA = North America, NR = Information was not reported, SP = Speciality Pharmacies

\$ is < \$50, \$\$ is between \$50 – \$99, \$\$\$ is between \$100 – \$499, \$\$\$\$ is > \$500

#### APPENDIX 4 Commercially available non-oral smart MAPs

| Product Name           | Product Manufacturer | Country or Region of Availability | Cost   | Subscription Fee | Alarm Portability | Patient Notifications | Cell Phone Required |
|------------------------|----------------------|-----------------------------------|--------|------------------|-------------------|-----------------------|---------------------|
| <b>Smart inhalers</b>  |                      |                                   |        |                  |                   |                       |                     |
| Airduodigihaler™       | Teva Pharmaceutical  | NA                                | \$\$   |                  | ✓                 |                       |                     |
| Findair™               | Krakow Tech          | EU                                | \$\$   |                  | ✓                 | ✓                     | ✓                   |
| Hailie™                | AstraZeneca          | NA                                | \$\$\$ |                  | ✓                 | ✓                     | ✓                   |
| ProAir™ digihaler™     | Teva Pharmaceutical  | NA                                | \$\$   |                  | ✓                 |                       |                     |
| Propeller Sensor       | Propeller Health     | NA                                | Free   |                  | ✓                 | ✓                     | ✓                   |
| <b>Smart injectors</b> |                      |                                   |        |                  |                   |                       |                     |
| inPen                  | Companion medical    | NA                                | \$\$   | ✓                | ✓                 |                       | ✓                   |

EU = Europe, NA = North America, NR = Information was not reported  
 \$ is < \$50, \$\$ is between \$50 – \$99, \$\$\$ is between \$100 – \$499, \$\$\$\$ is > \$500

## APPENDIX 5 Prototype smart MAPs

| Product Name                      | Product Manufacturer  | Storage Capacity | Alarm | Locking Feature | Portability | Patient Notifications | Cell Phone Required |
|-----------------------------------|-----------------------|------------------|-------|-----------------|-------------|-----------------------|---------------------|
| <b>Automated Dispenser</b>        |                       |                  |       |                 |             |                       |                     |
| Electronic Medication Dispenser   | NR                    | Multidose        | ✓     |                 | NR          | ✓                     |                     |
| Dyn-e-pill system                 | NR                    | Multidose        | ✓     | ✓               | NR          | ✓                     | ✓                   |
| Smart drug dispenser              | Balda Healthcare      | Unitdose         | ✓     | ✓               | ✓           | ✓                     | ✓                   |
| Medicube                          | NR                    | Multidose        | ✓     | NR              | NR          | ✓                     |                     |
| <b>Blister Pack</b>               |                       |                  |       |                 |             |                       |                     |
| Smart blister pack                | NR                    | Unitdose         |       |                 | ✓           | ✓                     | ✓                   |
| PillTracker                       | PillTracker           | Unitdose         | ✓     | ✓               | ✓           | ✓                     |                     |
| Smart blister pack                | NR                    | Unitdose         |       |                 | ✓           |                       |                     |
| <b>Dossette/Pill boxes</b>        |                       |                  |       |                 |             |                       |                     |
| DoPill                            | Domedic               | Multidose        | ✓     |                 | ✓           | ✓                     |                     |
| Smart medication dispenser        | NR                    | Multidose        | ✓     |                 |             |                       |                     |
| Pillconnect                       | Euclid                | Unitdose         | ✓     | ✓               | ✓           | ✓                     | ✓                   |
| Smart pillbox                     | Jeyun Medical Co      | Multidose        | ✓     |                 |             | ✓                     |                     |
| Smart pill box                    | NR                    | Multidose        | ✓     |                 |             | ✓                     |                     |
| <b>Storage Box</b>                |                       |                  |       |                 |             |                       |                     |
| Time4Med                          | Adherence Innovations | NR               |       |                 | ✓           |                       |                     |
| NR = Information was not reported |                       |                  |       |                 |             |                       |                     |

Faisal S, et al. A review of features and characteristics of smart medication adherence products. *Can Pharm J (Ott)* 2021;154. DOI: 10.1177/17151635211034198.
